# Supplementary material for: Development of a base editor for protein evolution via in situ mutation in vivo
Source: PubMed Central journal article supplement (PMC8450078; doi:10.1093/nar/gkab673), 2021-08-14
Supplement: gkab673_supplemental_file.pdf [file gkab673_supplemental_file.pdf]

## Supplementary Materials

### Development of a base editor for protein evolution via *in situ* mutation *in vivo*

Wenliang Hao<sup>#</sup>, Wenjing Cui<sup>#</sup>, Zhongyi Cheng, Laichuang Han, Feiya Suo, Zhongmei Liu, Li Zhou, Zhemin Zhou\*

<sup>1</sup>The Key Laboratory of Industrial Biotechnology (Ministry of Education), School of Biotechnology, Jiangnan University, 1800 Lihu Avenue, Wuxi 214122, China

### Supplementary Information

Supplementary Table S1. The strains used in this study.

Supplementary Table S2. The primers used for gene cloning in this study.

Supplementary Table S3. The plasmids used in this study.

Supplementary Table S4. The gRNA sequences used in this study.

Supplementary Table S5. The mutations of SecYEG and BceB.

Supplementary Table S6. The off-target analysis of CRISPR-CDA-nCas9-UGI

Supplementary Figure S1. Design and construction of multiplex base editing system.

Supplementary Figure S2. Mixed culture sequencing for multiplex base editing in *B. subtilis*.

Supplementary Figure S3. Improvement of editing efficiency by iterating in *B. subtilis*.

Supplementary Figure S4. Sequencing results of the Sec translocase mutants isolated from the mutant library.

Supplementary Figure S5. Off-target editing activities of CRISPR-CDA-nCas9-UGI in *B. subtilis*.

**Supplementary Table S1. The strains used in this study.**

| <b>Strains</b>            | <b>Relevant characteristics</b>                                                                                                                                                               | <b>References or sources</b> |
|---------------------------|-----------------------------------------------------------------------------------------------------------------------------------------------------------------------------------------------|------------------------------|
| <i>E. coli</i><br>JM109   | <i>recA1, supE44 endA1 hsdR17</i> ( <sup>-</sup> k,m <sup>+</sup> k) <i>gyrA96</i><br><i>relA1 thi (lac-proAB) F'</i> [ <i>traD36 proAB<sup>+</sup> lacI<sup>q</sup></i><br><i>lacZΔM15</i> ] | Lab stock                    |
| <i>B. subtilis</i><br>168 | <i>trpC2</i>                                                                                                                                                                                  | Lab stock                    |
| BS1-sigE                  | <i>lacA::P<sub>xyIA</sub>-CDA-dCas9, Cm<sup>R</sup></i> , harboring pHY-<br>ECBE plasmid.                                                                                                     | This study                   |
| BS2-sigE                  | <i>lacA :: P<sub>xyIA</sub>-CDA-nCas9, Cm<sup>R</sup></i> , harboring pHY-<br>ECBE plasmid                                                                                                    | This study                   |
| BS3-sigE                  | <i>lacA :: P<sub>xyIA</sub>-CDA-nCas9, Cm<sup>R</sup></i> , harboring pHY-<br>ECBE(Site 1)                                                                                                    | This study                   |
| BS4-sigE                  | <i>lacA :: P<sub>xyIA</sub>-CDA-nCas9, Cm<sup>R</sup></i> , harboring pHY-<br>ECBE(Site 2)                                                                                                    | This study                   |
| BS5-sigE                  | <i>lacA :: P<sub>xyIA</sub>-CDA-nCas9, Cm<sup>R</sup></i> , harboring pHY-<br>ECBE(Site 3)                                                                                                    | This study                   |
| BS6-sigE                  | <i>lacA :: P<sub>xyIA</sub>-CDA-nCas9, Cm<sup>R</sup></i> , harboring pHY-<br>ECBE(Site 4)                                                                                                    | This study                   |
| BS7                       | <i>lacA::P<sub>xyIA</sub>-CDA-nCas9-UGI, Cm<sup>R</sup></i>                                                                                                                                   | This study                   |
| BS8                       | <i>lacA::P<sub>xyIA</sub>-CDA-nCas9-UGI, Cm<sup>R</sup></i> , <i>amyE::P<sub>veg-</sub></i><br><i>SecY(T1), Spc<sup>R</sup></i>                                                               | This study                   |
| BS9                       | <i>lacA::P<sub>xyIA</sub>-CDA-nCas9-UGI, Cm<sup>R</sup></i> , <i>amyE::P<sub>veg-</sub></i>                                                                                                   | This study                   |

|      |                                                                                                                                                                                                   |            |
|------|---------------------------------------------------------------------------------------------------------------------------------------------------------------------------------------------------|------------|
|      | SecY(T2), Spc <sup>R</sup>                                                                                                                                                                        |            |
| BS10 | <i>lacA</i> ::P <sub>xyIA</sub> -CDA-nCas9-UGI, Cm <sup>R</sup> , <i>amyE</i> ::P <sub>veg</sub> <sup>-</sup><br>SecY(T3), Spc <sup>R</sup>                                                       | This study |
| BS11 | <i>lacA</i> ::P <sub>xyIA</sub> -CDA-nCas9-UGI, Cm <sup>R</sup> , <i>amyE</i> ::P <sub>veg</sub> <sup>-</sup><br>SecY(T0)/P <sub>veg</sub> -SecE(ET), Spc <sup>R</sup>                            | This study |
| BS12 | <i>lacA</i> ::P <sub>xyIA</sub> -CDA-nCas9-UGI, Cm <sup>R</sup> , <i>amyE</i> ::P <sub>veg</sub> <sup>-</sup><br>SecY(T0)/P <sub>veg</sub> -SecE(ET)/P <sub>veg</sub> -SecG(GT), Spc <sup>R</sup> | This study |
| BS13 | <i>lacA</i> ::P <sub>xyIA</sub> -CDA-nCas9-UGI, Cm <sup>R</sup> , <i>amyE</i> ::P <sub>veg</sub> <sup>-</sup><br>SecY(T3)/P <sub>veg</sub> -SecE(ET), Spc <sup>R</sup>                            | This study |
| BS14 | <i>lacA</i> ::P <sub>xyIA</sub> -CDA-nCas9-UGI, Cm <sup>R</sup> , <i>amyE</i> ::P <sub>veg</sub> <sup>-</sup><br>SecY(T3)/P <sub>veg</sub> -SecE(ET)/P <sub>veg</sub> -SecG(GT), Spc <sup>R</sup> | This study |
| BS15 | <i>lacA</i> ::P <sub>xyIA</sub> -CDA-nCas9-UGI, Cm <sup>R</sup> , <i>amyE</i> ::P <sub>veg</sub> <sup>-</sup><br>bceB(B3)/P <sub>veg</sub> -bceB(B6), Spc <sup>R</sup>                            | This study |
| BS16 | <i>lacA</i> ::P <sub>xyIA</sub> -CDA-nCas9-UGI, Cm <sup>R</sup> , <i>amyE</i> ::P <sub>veg</sub> <sup>-</sup><br>bceB(B3)/P <sub>veg</sub> -bceB(B6)/P <sub>veg</sub> -bceB(B9), Spc <sup>R</sup> | This study |
| BS17 | <i>lacA</i> ::P <sub>xyIA</sub> -CDA-nCas9-UGI, Cm <sup>R</sup> , <i>amyE</i> ::P <sub>veg</sub> <sup>-</sup><br>bceB(B4)/P <sub>veg</sub> -bceB(B5), Spc <sup>R</sup>                            | This study |
| BS18 | <i>lacA</i> ::P <sub>xyIA</sub> -CDA-nCas9-UGI, Cm <sup>R</sup> , <i>amyE</i> ::P <sub>veg</sub> <sup>-</sup><br>bceB(B4)/P <sub>veg</sub> -bceB(B5)/P <sub>veg</sub> -bceB(B6), Spc <sup>R</sup> | This study |
| BS19 | <i>lacA</i> ::P <sub>xyIA</sub> -CDA-nCas9-UGI, Cm <sup>R</sup> , <i>amyE</i> ::P <sub>veg</sub> <sup>-</sup><br>bceB(B1)/P <sub>veg</sub> -bceB(B8), Spc <sup>R</sup>                            | This study |
| BS20 | <i>lacA</i> ::P <sub>xyIA</sub> -CDA-nCas9-UGI, Cm <sup>R</sup> , <i>amyE</i> ::P <sub>veg</sub> <sup>-</sup>                                                                                     | This study |

|  |                                                                                   |  |
|--|-----------------------------------------------------------------------------------|--|
|  | bceB(B1)/P <sub>veg</sub> -bceB(B8)/P <sub>veg</sub> -bceB(B10), Spc <sup>R</sup> |  |
|--|-----------------------------------------------------------------------------------|--|

**Supplementary Table S2. Primers used in this study**

| Primers         | Sequences (5'-3')                                      |
|-----------------|--------------------------------------------------------|
| pHY-ECBE-F      | aaagcctccattatctaaagatggtttagagctagaaatagcaagttaaataag |
| pHY-ECBE-R      | aaccatcttagataatggaggctttatattttacataatcgcgcgc         |
| pHY-ECBE1-F     | gctcccaaacggcgatcaggggttttagagctagaaatagcaagttaaataag  |
| pHY-ECBE1-R     | cctgatcggcgttgggagctttatattttacataatcgcgcgc            |
| pHY-ECBE2-F     | tcctcatcttagataatgggttttagagctagaaatagcaagttaaataag    |
| pHY-ECBE2-R     | ccattatctaaagatgaggatttatattttacataatcgcgcgc           |
| pHY-ECBE3-F     | aaagcctccattatctaaagatggtttagagctagaaatagcaagttaaataag |
| pHY-ECBE3-R     | aaccatcttagataatggaggctttatattttacataatcgcgcgc         |
| pHY-ECBE4-F     | catcaaaggaaacctctgaagtttagagctagaaatagcaagttaaataag    |
| pHY-ECBE4-R     | ttcagaggtttctttgatgtttatattttacataatcgcgcgc            |
| pHY-ECBE-21nt-F | gtaaaatataaacgcctccattatctaaagatggtttag                |
| pHY-ECBE-21nt-R | gataatggaggcgtttatattttacataatcgcgcgc                  |
| pHY-ECBE-22nt-F | gtaaaatataaacgcctccattatctaaagatggtttag                |
| pHY-ECBE-22nt-R | gataatggaggcggttatattttacataatcgcgcgc                  |
| pHY-ECBE-23nt-F | gtaaaatataaagccgcctccattatctaaagatggtttag              |
| pHY-ECBE-23nt-R | taatggaggcggctttatattttacataatcgcgcgc                  |
| pHY-ECBE-24nt-F | aaaatataaatgccgcctccattatctaaagatggtttag               |
| pHY-ECBE-24nt-R | gataatggaggcggcatttatattttacataatcgcgcgc               |
| pHY-ECBE-25nt-F | gtaaaatataaactgccgcctccattatctaaagatggtttag            |
| pHY-ECBE-25nt-R | atggaggcggcagtttatattttacataatcgcgcgc                  |
| pHY-ECBE-26nt-F | gtaaaatataaacctgccgcctccattatctaaagatggtttag           |
| pHY-ECBE-26nt-R | tggaggcggcaggtttatattttacataatcgcgcgc                  |
| pHY-ASL-F       | gggccgcagccctattgggcaagcggcccttttcttcagcacaattccaag    |
| pHY-ASL-R       | gggccgcttgcceaatagggctgcggcccgcaccgactcgggtgcc         |
| pHY-T3-F        | ctcctaatacatttggcgggttttagagctagaaatagcaagttaaataag    |
| pHY-T3-R        | ccgcaaagtattaaggagtttatattttacataatcgcgcgc             |
| pHY-T1-F        | atcactcacacgcataaagtgttttagagctagaaatagcaagttaaataag   |
| pHY-T1-R        | actttatgcgtgtgagtgattttatattttacataatcgcgcgc           |
| pHY-T2-F        | cctgcaggattcacttcaagtttagagctagaaatagcaagttaaataag     |
| pHY-T2-R        | ttgaaagtgaatcctgcagggtttatattttacataatcgcgcgc          |
| nCDA-F          | ggaaatgggatccatgacagatgccgaatacgttc                    |
| nCDA-R          | tccattctagaagctgcagaaccgacggccgggctcttc                |
| nCDA-b-F        | cgtcggttctgcagcttctagaatggataagaatactcaataggcttag      |
| nCDA-b-R        | cggcatctgcatggatcccattccccctttgattttta                 |
| pAX-UGI-F       | cagctaggaggtgacggaccgaagaagaagcgc                      |
| pAX-UGI-R       | gatccttactcaggttaaagcattttgatcttattctcgcc              |

|                |                                                        |
|----------------|--------------------------------------------------------|
| pAX-UGI-b-F    | caaatgctttaactcgagtaaggatctccagg                       |
| pAX-UGI-b-R    | cttcttcggtcgcacacctctagctgactcaaa                      |
| mAmpR-BsaI-F   | atgataccgcggggaccacgctcaccggct                         |
| mAmpR-BsaI-R   | gtgagcgtgggtccccgcggtatcattgcagcac                     |
| secY-F         | gtttaccgagtggtctaagcagtttagagctagaaatagcaagttaaaataag  |
| secY-R         | aactgcttagaccactcggtaaacatttattgtacaacacgagcc          |
| SecYT3-F       | ctcctaatacatttggcgggttagagctagaaatagcaagttaaaataag     |
| SecYT3-R       | ccgccaatgtattaaggagacatttattgtacaacacgagcc             |
| secE-F         | gtaactgtgaaattaccgtaagtttagagctagaaatagcaagttaaaataag  |
| secE-R         | aacttacggtaattcaacagttacatttattgtacaacacgagcc          |
| secG-F         | gtctgccagcactaccgtaatggtttagagctagaaatagcaagttaaaataag |
| secG-R         | aaccattacggtagtgctggcagacatttattgtacaacacgagcc         |
| secY-Go-dual-F | ggctcatccattattaacgttgatataatttaaattttattgacaaaaatgg   |
| secY-Go-dual-R | ggctcgcacaaaaaagcaccgactcgg                            |
| secE-Go-dual-F | ggctcaggtgttattaacgttgatataatttaaattttattgacaaaaatgg   |
| secE-Go-dual-R | ggctcgaagcaaaaaagcaccgactcgg                           |
| secE-Go-tri-R  | ggctcgtatggaaaaaagcaccgactcgg                          |
| secG-Go-tri-F  | ggctcaccattattaacgttgatataatttaaattttattgacaaaaatgg    |
| secYE-Go-b-F   | ggctcagcttaagcttgggcttaattaattaagactc                  |
| secYE-Go-b-R   | ggctcttggaggatcccgtcgacgc                              |
| pHY-B1-F       | tccagcaattaacgaagttagttagagctagaaatagcaagttaaaataag    |
| pHY-B1-R       | tcacttcgtaattgctggatttatattttacataatcgcgcgc            |
| pHY-B2-F       | cttcaattgtcttcagtggttttagagctagaaatagcaagttaaaataag    |
| pHY-B2-R       | ccactgaagacaaaagtgaagtattattttacataatcgcgcgc           |
| pHY-B3-F       | cgcaacaaacagttcattaagtttagagctagaaatagcaagttaaaataag   |
| pHY-B3-R       | ttaatgaactgtttgtgctttatattttacataatcgcgcgc             |
| pHY-B4-F       | agccgctacattttgtcaggttttagagctagaaatagcaagttaaaataag   |
| pHY-B4-R       | ctgaacaaaatgtagcggctttatattttacataatcgcgcgc            |
| pHY-B5-F       | tcaacatttcttcgaggacgttttagagctagaaatagcaagttaaaataag   |
| pHY-B5-R       | gtcctgcaagcaaatgttgatttatattttacataatcgcgcgc           |
| pHY-B6-F       | acagcaagctgcatattgccgttttagagctagaaatagcaagttaaaataag  |
| pHY-B6-R       | ggcaatatgcagcttctgttttatattttacataatcgcgcgc            |
| pHY-B7-F       | gccccgctgtaaacgtgtgttttagagctagaaatagcaagttaaaataag    |
| pHY-B7-R       | acacgtttacaagcgggggctttatattttacataatcgcgcgc           |
| pHY-B8-F       | ctggcgcaatctacatttatgttttagagctagaaatagcaagttaaaataag  |
| pHY-B8-R       | ataaatgtagattgcgccagtttatattttacataatcgcgcgc           |
| pHY-B9-F       | caccatttgtttaaaataagtttagagctagaaatagcaagttaaaataag    |
| pHY-B9-R       | ttattttaaacaaatgggtgtttatattttacataatcgcgcgc           |
| pHY-B10-F      | actgcgctctactccatttgttttagagctagaaatagcaagttaaaataag   |
| pHY-B10-R      | aaaatggagtagagcgcagttttatattttacataatcgcgcgc           |
| pAD-B1-F       | tccagcaattaacgaagttagttagagctagaaatagcaagttaaaataag    |
| pAD-B1-R       | tcacttcgtaattgctggaacatttattgtacaacacgagcc             |
| pAD-B3-F       | cgcaacaaacagttcattaagtttagagctagaaatagcaagttaaaataag   |

|           |                                                       |
|-----------|-------------------------------------------------------|
| pAD-B3-R  | ttaatgaactgtttgttgcgacatttattgtacaacacgagcc           |
| pAD-B4-F  | agccgctacattttgttcaggtttagagctagaaatagcaagttaaataag   |
| pAD-B4-R  | ctgaacaaaatgtagcggctacatttattgtacaacacgagcc           |
| pAD-B5-F  | tcaacatttgccttcaggacgttttagagctagaaatagcaagttaaataag  |
| pAD-B5-R  | gtcctgcaagcaaatgtgaacatttattgtacaacacgagcc            |
| pAD-B6-F  | acagcaagctgcatattgccgttttagagctagaaatagcaagttaaataag  |
| pAD-B6-R  | ggcaaatgcagcttgcctgtacatttattgtacaacacgagcc           |
| pAD-B8-F  | ctggcgcaatctacatttattgttttagagctagaaatagcaagttaaataag |
| pAD-B8-R  | ataaatgtagattgcgccagacatttattgtacaacacgagcc           |
| pAD-B9-F  | caccatttgtttaaataagtttagagctagaaatagcaagttaaataag     |
| pAD-B9-R  | ttatttaaacaatgggtgacatttattgtacaacacgagcc             |
| pAD-B10-F | actgcgcttactccatttgttttagagctagaaatagcaagttaaataag    |
| pAD-B10-R | aaaatggagtagagcgcagtagacatttattgtacaacacgagcc         |

**Supplementary Table S3. The plasmids used in this study**

| Plasmids                  | Relevant characteristics                                                                                           | References or sources |
|---------------------------|--------------------------------------------------------------------------------------------------------------------|-----------------------|
| pHYT-P43-G10              | <i>E.coli-B.subtilis</i> shuttle vector , P43 promoter , gRNA targeting GFP, Amp <sup>R</sup> , Tet <sup>R</sup>   | Lu et al., 2019 (1)   |
| pDGT-GFP                  | <i>B. subtilis</i> integration vector, P43-GFP cassette, spec <sup>R</sup>                                         | Lu et al., 2019 (1)   |
| pDGT-GFP-Amp <sub>m</sub> | Derived from pDGT-GFP, P43-GFP cassette , synonymous mutation in AmpR (TCT240TCC ), spec <sup>R</sup>              | This study            |
| pAX01-Cpf1                | <i>B. subtilis</i> integration vector , xylR-P <sub>xyl</sub> -Cpf1 cassette, spec <sup>R</sup> , Cm <sup>R</sup>  | Lab stock             |
| pAX-nCas9                 | <i>B. subtilis</i> integration vector , xylR-P <sub>xyl</sub> -nCas9 cassette, spec <sup>R</sup> , Cm <sup>R</sup> | Lab stock             |
| pAX-dCas9                 | <i>B. subtilis</i> integration vector , xylR-P <sub>xyl</sub> -dCas9 cassette, spec <sup>R</sup> , Cm <sup>R</sup> | Lab stock             |
| pHY-ECBE                  | Derived from pHYT-P43-G10, gRNA targeting <i>sigE</i>                                                              | This study            |
| pAD-T0                    | pAD123 derivative, P <sub>veg</sub> promoter, containing gRNA expression cassette targeting <i>secY</i>            | This study            |
| pAD-T3                    | pAD123 derivative, P <sub>veg</sub> promoter,                                                                      | This study            |

|             |                                                                                                                                                       |            |
|-------------|-------------------------------------------------------------------------------------------------------------------------------------------------------|------------|
|             | containing gRNA expression cassette targeting <i>secY</i> (T3)                                                                                        |            |
| pAD-secE    | pAD123 derivative, P <sub>veg</sub> promoter, containing gRNA expression cassette targeting <i>secE</i>                                               | This study |
| pAD-secG    | pAD123 derivative, P <sub>veg</sub> promoter, containing gRNA expression cassette targeting <i>secG</i>                                               | This study |
| pDGT-T1     | pDGT-GFP derivative, P <sub>veg</sub> promoter, containing gRNA expression cassette targeting <i>secY</i> (T1)                                        | This study |
| pDGT-T2     | pDGT-GFP derivative, P <sub>veg</sub> promoter, containing gRNA expression cassette targeting <i>secY</i> (T2)                                        | This study |
| pDGT-T3     | pDGT-GFP derivative, P <sub>veg</sub> promoter, containing gRNA expression cassette targeting <i>secY</i> (T3)                                        | This study |
| pDGT-T0ET   | pDGT-GFP derivative, P <sub>veg</sub> promoter, containing gRNA expression cassette targeting <i>secY</i> and <i>secE</i>                             | This study |
| pDGT-T0ETGT | pDGT-GFP derivative, P <sub>veg</sub> promoter, containing gRNA expression cassette targeting <i>secY</i> , <i>secE</i> and <i>secG</i>               | This study |
| pDGT-T3ET   | pDGT-GFP derivative, P <sub>veg</sub> promoter, containing gRNA expression cassette targeting <i>secY</i> (T3) and <i>secE</i> (ET)                   | This study |
| pDGT-T3ETGT | pDGT-GFP derivative, P <sub>veg</sub> promoter, containing gRNA expression cassette targeting <i>secY</i> (T3), <i>secE</i> (ET) and <i>secG</i> (GT) | This study |
| pAD-B1      | pAD123 derivative, P <sub>veg</sub> promoter, containing gRNA expression cassette targeting <i>bceB</i> (B1)                                          | This study |
| pAD-B3      | pAD123 derivative, P <sub>veg</sub> promoter, containing gRNA expression cassette targeting <i>bceB</i> (B3)                                          | This study |
| pAD-B4      | pAD123 derivative, P <sub>veg</sub> promoter, containing gRNA expression                                                                              | This study |

|               |                                                                                                                                                        |            |
|---------------|--------------------------------------------------------------------------------------------------------------------------------------------------------|------------|
|               | cassette targeting <i>bceB</i> (B4)                                                                                                                    |            |
| pAD-B5        | pAD123 derivative, P <sub>veg</sub> promoter, containing gRNA expression cassette targeting <i>bceB</i> (B5)                                           | This study |
| pAD-B6        | pAD123 derivative, P <sub>veg</sub> promoter, containing gRNA expression cassette targeting <i>bceB</i> (B6)                                           | This study |
| pAD-B8        | pAD123 derivative, P <sub>veg</sub> promoter, containing gRNA expression cassette targeting <i>bceB</i> (B8)                                           | This study |
| pAD-B9        | pAD123 derivative, P <sub>veg</sub> promoter, containing gRNA expression cassette targeting <i>bceB</i> (B9)                                           | This study |
| pAD-B10       | pAD123 derivative, P <sub>veg</sub> promoter, containing gRNA expression cassette targeting <i>bceB</i> (B10)                                          | This study |
| pDGT-B36      | pDGT-GFP derivative, P <sub>veg</sub> promoter, containing gRNA expression cassette targeting <i>bceB</i> (B3) and <i>bceB</i> (B6)                    | This study |
| pDGT-B369     | pDGT-GFP derivative, P <sub>veg</sub> promoter, containing gRNA expression cassette targeting <i>bceB</i> (B3), <i>bceB</i> (B6) and <i>bceB</i> (B9)  | This study |
| pDGT-B45      | pDGT-GFP derivative, P <sub>veg</sub> promoter, containing gRNA expression cassette targeting <i>bceB</i> (B4) and <i>bceB</i> (B5)                    | This study |
| pDGT-B456     | pDGT-GFP derivative, P <sub>veg</sub> promoter, containing gRNA expression cassette targeting <i>bceB</i> (B4), <i>bceB</i> (B5) and <i>bceB</i> (B6)  | This study |
| pDGT-B18      | pDGT-GFP derivative, P <sub>veg</sub> promoter, containing gRNA expression cassette targeting <i>bceB</i> (B1) and <i>bceB</i> (B8)                    | This study |
| pDGT-B1810    | pDGT-GFP derivative, P <sub>veg</sub> promoter, containing gRNA expression cassette targeting <i>bceB</i> (B1), <i>bceB</i> (B8) and <i>bceB</i> (B10) | This study |
| pAX-CDA-dCas9 | pAX01-Cpf1 derivative, P <sub>xyIA</sub> -CDA-dCas9 expression cassette, spec <sup>R</sup> , Cm <sup>R</sup>                                           | This study |



|                                |                                                                                                                                                                                                                                |            |
|--------------------------------|--------------------------------------------------------------------------------------------------------------------------------------------------------------------------------------------------------------------------------|------------|
| pAX-CDA-nCas9                  | pAX-CDA-dCas9 derivative, P <sub>xylA</sub> -CDA-nCas9 cassette, spec <sup>R</sup> , Cm <sup>R</sup> expression                                                                                                                | This study |
| pAX-CDA-nCas9-UGI              | pAX-CDA-nCas9 derivative, P <sub>xylA</sub> -CDA-nCas9-UGI cassette, spec <sup>R</sup> , Cm <sup>R</sup> expression                                                                                                            | This study |
| pB-P <sub>srfA</sub> -WapA-GFP | <i>E.coli-B.subtilis</i> shuttle vector, containing P <sub>srfA</sub> -WapA-GFP expression cassette, Amp <sup>R</sup> , Kan <sup>R</sup>                                                                                       | This study |
| pHT-ETGT                       | <i>E.coli-B.subtilis</i> shuttle vector, containing xylR-P <sub>xylA</sub> -CDA-nCas9-UGI expression cassette and gRNA expression cassette targeting <i>secE</i> (ET) and <i>secG</i> (GT), Amp <sup>R</sup> , Cm <sup>R</sup> | This study |

**Supplementary Table S4. sgRNAs used in this study**

| sgRNA Sequences (5'-3')                                                                                                                                                                               | PAM | Purpose                      |
|-------------------------------------------------------------------------------------------------------------------------------------------------------------------------------------------------------|-----|------------------------------|
| (GCCTCCATTATCTAAAGATG) <sup>a</sup> GTTT TAGAGCTAGAAATAGCAAGTAAA ATAAGGCTAGTCCGTTAT(CAACTTG AAAAAGTGGCACCGAGTCGGTGCTT TTTT) <sup>b</sup>                                                              | AGG | Targeting <i>sigE</i> (20nt) |
| (GCCTCCATTATCTAAAGATG) <sup>a</sup> GTTT TAGAGCTAGAAATAGCAAGTAAA ATAAGGCTAGTCCGTTAT(CAACTTG AAAAAGTGGCACCGAGTCGGTGC) <sup>b</sup> ( GGGCCGCAGCCCTATTGGGCAAAG CGGCCC) <sup>c</sup> TTTTTT <sup>b</sup> | AGG | Targeting <i>sigE</i> (20nt) |
| (CGCCTCCATTATCTAAAGATG) <sup>a</sup> GTT TTAGAGCTAGAAATAGCAAGTTAA AATAAGGCTAGTCCGTTAT(CAACTT GAAAAAGTGGCACCGAGTCGGTGC TTTTTT) <sup>b</sup>                                                            | AGG | Targeting <i>sigE</i> (21nt) |
| (CCGCCTCCATTATCTAAAGATG) <sup>a</sup> GT TTTAGAGCTAGAAATAGCAAGTTAA AATAAGGCTAGTCCGTTAT(CAACTT GAAAAAGTGGCACCGAGTCGGTGC TTTTTT) <sup>b</sup>                                                           | AGG | Targeting <i>sigE</i> (22nt) |
| (GCCGCCTCCATTATCTAAAGATG) <sup>a</sup> G TTTTAGAGCTAGAAATAGCAAGTTA AATAAGGCTAGTCCGTTAT(CAAC                                                                                                           | AGG | Targeting <i>sigE</i> (23nt) |

|                                                                                                                                                            |     |                                |
|------------------------------------------------------------------------------------------------------------------------------------------------------------|-----|--------------------------------|
| TTGAAAAAGTGGCACCGAGTCGGT<br>GCTTTTTT) <sup>b</sup>                                                                                                         |     |                                |
| (TGCCGCCTCCATTATCTAAAGATG) <sup>a</sup><br>GTTTTAGAGCTAGAAATAGCAAGTT<br>AAAATAAGGCTAGTCCGTTAT(CAA<br>CTTGAAAAAGTGGCACCGAGTCGGT<br>GCTTTTTT) <sup>b</sup>   | AGG | Targeting <i>sigE</i> (24nt)   |
| (CTGCCGCCTCCATTATCTAAAGATG<br>) <sup>a</sup> GTTTTAGAGCTAGAAATAGCAAGT<br>TAAAATAAGGCTAGTCCGTTAT(CA<br>ACTTGAAAAAGTGGCACCGAGTCG<br>GTGCTTTTTT) <sup>b</sup> | AGG | Targeting <i>sigE</i> (25nt)   |
| (CCTGCCGCCTCCATTATCTAAAGAT<br>G) <sup>a</sup> GTTTTAGAGCTAGAAATAGCAAG<br>TAAAATAAGGCTAGTCCGTTAT(C<br>AACTTGAAAAAGTGGCACCGAGTC<br>GGTGCTTTTTT) <sup>b</sup> | AGG | Targeting <i>sigE</i> (26nt)   |
| (GCTCCCAAACGGCGATCAGG) <sup>a</sup> GTT<br>TTAGAGCTAGAAATAGCAAGTTAA<br>AATAAGGCTAGTCCGTTAT(CAACTT<br>GAAAAAGTGGCACCGAGTCGGTGC<br>TTTTT) <sup>b</sup>       | CGG | Targeting <i>sigE</i> (Site 1) |
| (TCCTCATCTTTAGATAATGG) <sup>a</sup> GTTT<br>TAGAGCTAGAAATAGCAAGTTAAA<br>ATAAGGCTAGTCCGTTAT(CAACTTG<br>AAAAAGTGGCACCGAGTCGGTGCTT<br>TTTT) <sup>b</sup>      | AGG | Targeting <i>sigE</i> (Site 2) |
| (GCCTCCATTATCTAAAGATG) <sup>a</sup> GTTT<br>TAGAGCTAGAAATAGCAAGTTAAA<br>ATAAGGCTAGTCCGTTAT(CAACTTG<br>AAAAAGTGGCACCGAGTCGGTGCTT<br>TTTT) <sup>b</sup>      | AGG | Targeting <i>sigE</i> (Site 3) |
| (CATCAAAGGAAACCTCTGAA) <sup>a</sup> GTT<br>TTAGAGCTAGAAATAGCAAGTTAA<br>AATAAGGCTAGTCCGTTAT(CAACTT<br>GAAAAAGTGGCACCGAGTCGGTGC<br>TTTTT) <sup>b</sup>       | CGG | Targeting <i>sigE</i> (Site 4) |
| (TTTACCGAGTGGTCTAAGCA) <sup>a</sup> GTTT<br>TAGAGCTAGAAATAGCAAGTTAAA<br>ATAAGGCTAGTCCGTTAT(CAACTTG<br>AAAAAGTGGCACCGAGTCGGTGCTT<br>TTTT) <sup>b</sup>      | AGG | Targeting <i>secY</i> (T0)     |
| (ATCACTCACACGCATAAAGT) <sup>a</sup> GTTT<br>TAGAGCTAGAAATAGCAAGTTAAA                                                                                       | TGG | Targeting <i>secY</i> (T1)     |

|                                                                                                                                                       |     |                            |
|-------------------------------------------------------------------------------------------------------------------------------------------------------|-----|----------------------------|
| ATAAGGCTAGTCCGTTAT(CAACTTG<br>AAAAAGTGGCACCGAGTCGGTGCTT<br>TTTT) <sup>b</sup>                                                                         |     |                            |
| (CCTGCAGGATTCAC TTTCAA) <sup>a</sup> GTTT<br>TAGAGCTAGAAATAGCAAGTAAA<br>ATAAGGCTAGTCCGTTAT(CAACTTG<br>AAAAAGTGGCACCGAGTCGGTGCTT<br>TTTT) <sup>b</sup> | TGG | Targeting <i>secY</i> (T2) |
| (CTCCTTAATACATTTGGCGG) <sup>a</sup> GTTT<br>TAGAGCTAGAAATAGCAAGTAAA<br>ATAAGGCTAGTCCGTTAT(CAACTTG<br>AAAAAGTGGCACCGAGTCGGTGCTT<br>TTTT) <sup>b</sup>  | CGG | Targeting <i>secY</i> (T3) |
| (AACTGTTGAAATTACCGTAA) <sup>a</sup> GTTT<br>TAGAGCTAGAAATAGCAAGTAAA<br>ATAAGGCTAGTCCGTTAT(CAACTTG<br>AAAAAGTGGCACCGAGTCGGTGCTT<br>TTTT) <sup>b</sup>  | TGG | Targeting <i>secE</i>      |
| (CTGCCAGCACTACCGTAATG) <sup>a</sup> GTTT<br>TAGAGCTAGAAATAGCAAGTAAA<br>ATAAGGCTAGTCCGTTAT(CAACTTG<br>AAAAAGTGGCACCGAGTCGGTGCTT<br>TTTT) <sup>b</sup>  | CGG | Targeting <i>secG</i>      |
| (TCCAGCAATTAACGAAGTGA) <sup>a</sup> GTT<br>TTAGAGCTAGAAATAGCAAGTAA<br>AATAAGGCTAGTCCGTTAT(CAACTT<br>GAAAAAGTGGCACCGAGTCGGTGC<br>TTTTTT) <sup>b</sup>  | AGG | Targeting <i>bceB</i> (B1) |
| (CTTCACTTTGTCTTCAGTGG) <sup>a</sup> GTTT<br>TAGAGCTAGAAATAGCAAGTAAA<br>ATAAGGCTAGTCCGTTAT(CAACTTG<br>AAAAAGTGGCACCGAGTCGGTGCTT<br>TTTT) <sup>b</sup>  | AGG | Targeting <i>bceB</i> (B2) |
| (CGCAACAAACAGTTCATTAA) <sup>a</sup> GTTT<br>TAGAGCTAGAAATAGCAAGTAAA<br>ATAAGGCTAGTCCGTTAT(CAACTTG<br>AAAAAGTGGCACCGAGTCGGTGCTT<br>TTTT) <sup>b</sup>  | TGG | Targeting <i>bceB</i> (B3) |
| (AGCCGCTACATTTTGTTTCAG) <sup>a</sup> GTTT<br>TAGAGCTAGAAATAGCAAGTAAA<br>ATAAGGCTAGTCCGTTAT(CAACTTG<br>AAAAAGTGGCACCGAGTCGGTGCTT<br>TTTT) <sup>b</sup> | CGG | Targeting <i>bceB</i> (B4) |
| (TCAACATTTGCTTGCAGGAC) <sup>a</sup> GTTT                                                                                                              | AGG | Targeting <i>bceB</i> (B5) |

|                                                                                                                                                       |     |                             |
|-------------------------------------------------------------------------------------------------------------------------------------------------------|-----|-----------------------------|
| TAGAGCTAGAAATAGCAAGTTAAA<br>ATAAGGCTAGTCCGTTAT(CAACTTG<br>AAAAAGTGGCACCGAGTCGGTGCTT<br>TTTT) <sup>b</sup>                                             |     |                             |
| (ACAGCAAGCTGCATATTGCC) <sup>a</sup> GTTT<br>TAGAGCTAGAAATAGCAAGTTAAA<br>ATAAGGCTAGTCCGTTAT(CAACTTG<br>AAAAAGTGGCACCGAGTCGGTGCTT<br>TTTT) <sup>b</sup> | GGG | Targeting <i>bceB</i> (B6)  |
| (GCCCCGCTTGTAACGTGT) <sup>a</sup> GTTT<br>TAGAGCTAGAAATAGCAAGTTAAA<br>ATAAGGCTAGTCCGTTAT(CAACTTG<br>AAAAAGTGGCACCGAGTCGGTGCTT<br>TTTT) <sup>b</sup>   | AGG | Targeting <i>bceB</i> (B7)  |
| (CTGGCGCAATCTACATTTAT) <sup>a</sup> GTTT<br>TAGAGCTAGAAATAGCAAGTTAAA<br>ATAAGGCTAGTCCGTTAT(CAACTTG<br>AAAAAGTGGCACCGAGTCGGTGCTT<br>TTTT) <sup>b</sup> | CGG | Targeting <i>bceB</i> (B8)  |
| (CACCCATTTGTTTAAAATAA) <sup>a</sup> GTTT<br>TAGAGCTAGAAATAGCAAGTTAAA<br>ATAAGGCTAGTCCGTTAT(CAACTTG<br>AAAAAGTGGCACCGAGTCGGTGCTT<br>TTTT) <sup>b</sup> | AGG | Targeting <i>bceB</i> (B9)  |
| (ACTGCGCTCTACTCCATTTT) <sup>a</sup> GTTT<br>TAGAGCTAGAAATAGCAAGTTAAA<br>ATAAGGCTAGTCCGTTAT(CAACTTG<br>AAAAAGTGGCACCGAGTCGGTGCTT<br>TTTT) <sup>b</sup> | TGG | Targeting <i>bceB</i> (B10) |

Annotations:

<sup>a</sup>: 20-26 nt base target site

<sup>b</sup>: tracr RNA terminator

<sup>c</sup>: artificial stem loop

#### Supplementary Table S5. The mutations of SecYEG and BceB

| Mutants                  | Position of mutation                       |
|--------------------------|--------------------------------------------|
| SecY(T1)                 | M9I/S12N/D13N                              |
| SecY(T2)                 | A269T/G270K/V271I                          |
| SecY(T3)                 | L55F/L56F                                  |
| SecY/SecE(T3/ET)         | SecY(L55F/L56F)/SecE(V36I)                 |
| SecY/SecE/SecG(T3/ET/GT) | SecY(L55F/L56F)/SecE(V36I)/SecG(A62T/V63I) |

| SecE/SecG(ET/GT) | SecE(V36I)/SecG(A62T/V63I) |
|------------------|----------------------------|
| bceB(B1)         | P42L/A43V                  |
| bceB(B2)         | V194I                      |
| bceB(B3)         | V235I/A236T                |
| bceB(B4)         | A326T/A327T/D328N          |
| bceB(B5)         | V363I/D364N                |
| bceB(B6)         | A386T/V387I                |
| bceB(B7)         | S452N/G453K/G454N          |
| bceB(B8)         | A479V/Q480*                |
| bceB(B9)         | G552S                      |
| bceB(B10)        | T624I/A625V/L626F          |

**Supplementary Table S6. The off-target analysis of CRISPR-CDA-nCas9-UGI in *B. subtilis* 168**

| Loci & target sequence (5'-3')                  | similar DNA sequences <sup>a</sup> | Positions <sup>b</sup> | Mismatches <sup>c</sup> | Positive <sup>d</sup> |
|-------------------------------------------------|------------------------------------|------------------------|-------------------------|-----------------------|
| <i>bceB</i> (B3)<br>CGCAACAAACAGTT<br>CATTAATGG | gGCtCAAACAGTTCA<br>TgAA            | 3120467                | 4                       | N. D.                 |
|                                                 | CGaAACAAAtCgGTgtA<br>TTAA          | 658364                 | 5                       | N. D.                 |
|                                                 | CGCAAAcAaAGcTCc<br>TgAA            | 360677                 | 6                       | N. D.                 |
|                                                 | CGCAgCAAAttcaTCtT<br>TAA           | 443778                 | 6                       | N. D.                 |
|                                                 | gGCAtCAAAGAGTaCA<br>ccAA           | 591691                 | 6                       | N. D.                 |
|                                                 | CGCAcCAtgCtGTTgAT<br>aAA           | 793200                 | 6                       | N. D.                 |
|                                                 | CGgggCAAtCAtTTCAT<br>TtA           | 1263495                | 6                       | N. D.                 |
|                                                 | aaCAACAAAgAGgTC<br>ATTgc           | 1609401                | 6                       | N. D.                 |
|                                                 | CtgAtCAAACAaTTCaA<br>TgA           | 1179261                | 6                       | N. D.                 |
|                                                 | tGggACAAAttTTCATT<br>AA            | 1525202                | 6                       | N. D.                 |
|                                                 | gaCAACAAACtGTcCA<br>TTgt           | 1525575                | 6                       | N. D.                 |
|                                                 | gGCtAgAAACAGaTCA<br>TatA           | 1901709                | 6                       | N. D.                 |

|                                                 |                          |         |       |       |
|-------------------------------------------------|--------------------------|---------|-------|-------|
|                                                 | tGaAgaAAACcGTTtAT<br>TAA | 2122392 | 6     | N. D. |
|                                                 | CGCcAaAAAgAaTTgA<br>TaAA | 2945681 | 6     | N. D. |
|                                                 | gaaAAaAAACAGcTCA<br>TcAA | 3098482 | 6     | N. D. |
|                                                 | CGCcAaAAAttGaTCAT<br>gAA | 3185661 | 6     | N. D. |
|                                                 | CGCtgCAAgCgGcTtAT<br>TAA | 3235765 | 6     | N. D. |
|                                                 | CGgAAgcAAaAaTaCA<br>TTAA | 3626871 | 6     | N. D. |
|                                                 | gGCttCAAACAGcTcT<br>gAA  | 3738711 | 6     | N. D. |
|                                                 | CGCAAgAAtCAGgTtA<br>cTgA | 3853065 | 6     | N. D. |
| <i>bceB</i> (B4)<br>AGCCGCTACATTTTG<br>TTCAGCGG | gtCtGCgtCtTTTTGTTC<br>AG | 761694  | 6     | N. D. |
|                                                 | AGCaGagAaATTTTGT<br>TtgG | 831289  | 6     | N. D. |
|                                                 | AGCCGCTACAccagcT<br>TCaA | 509561  | 6     | N. D. |
|                                                 | AGgCGCagCATTTacT<br>TCaA | 284161  | 6     | N. D. |
|                                                 | tttgGCgtCATTTGTTC<br>AG  | 613248  | 6     | N. D. |
|                                                 | AGCCcCTgacTagTGTT<br>CAG | 288622  | 6     | N. D. |
|                                                 | AaCgaCTggATTgTGTT<br>CAG | 292295  | 6     | N. D. |
|                                                 | AcCgGCaAtATTTTGcc<br>CAG | 939589  | 6     | N. D. |
|                                                 | AaCCGgTAttTTTTGTg<br>CAt | 1236819 | 6     | N. D. |
|                                                 | AGCttCagCATTTTcTT<br>gAG | 1357073 | 6     | N. D. |
|                                                 | AGCCaCTcCtTcTgtTTC<br>AG | 1392805 | 6     | N. D. |
|                                                 | AGCttCTgCAaTTTGTat<br>AG | 1658479 | 6     | N. D. |
|                                                 | AGtCtCTtCATTTgGTg<br>CcG | 1814963 | 6     | N. D. |
| gGCtGCTgCATTTTaTc<br>CAa                        | 1894768                  | 6       | N. D. |       |

|                                                  |                          |         |   |       |
|--------------------------------------------------|--------------------------|---------|---|-------|
|                                                  | AGCCGgTACtaTgTtTTt<br>AG | 1887497 | 6 | N. D. |
|                                                  | AtCCctTACcTTTgGTT<br>CtG | 2098160 | 6 | N. D. |
|                                                  | AaaCGCaAaATTgcGTT<br>CAG | 2200181 | 6 | N. D. |
|                                                  | tGCCGCaACAgTTaGTa<br>CAc | 2404983 | 6 | N. D. |
|                                                  | AcCgtCTACATcTTtaT<br>CAG | 2528892 | 6 | N. D. |
|                                                  | AGCgGCTACAgTgTGg<br>ctAG | 3242693 | 6 | N. D. |
|                                                  | AGCCGgTACATTcaGT<br>gacG | 3286788 | 6 | N. D. |
|                                                  | AGCCGCagCATTTTGa<br>aaAc | 3198856 | 6 | N. D. |
|                                                  | AaCaaCaACATTTTcTT<br>CAa | 3351009 | 6 | N. D. |
|                                                  | AGCCGtTgtcTTTTtTcC<br>AG | 3280087 | 6 | N. D. |
|                                                  | gGgCGCTgCtTTTTGTT<br>Ctt | 3792635 | 6 | N. D. |
|                                                  | AGCgGCTgCtaTTTGgT<br>CgG | 4003257 | 6 | N. D. |
|                                                  | AatCtaTcCATTTTGTT<br>CcG | 4056053 | 6 | N. D. |
|                                                  | ACTcaGCTtTcCgCCAT<br>TTT | 1384242 | 5 | N. D. |
|                                                  | AaTGCGCTaTtCcgCAa<br>TTT | 1319511 | 6 | N. D. |
|                                                  | ttTcCcCTCTAaTCCtTT<br>TT | 862082  | 6 | N. D. |
|                                                  | AtTgaGCTCTtCTgCtT<br>TTc | 1327945 | 6 | N. D. |
|                                                  | taTGttCTCTcCTCtATT<br>TT | 1709986 | 6 | N. D. |
|                                                  | ACTtCGaTtTtCgCgATT<br>TT | 1676275 | 6 | N. D. |
|                                                  | ACaGCGgaCgAagCCA<br>TTTT | 1759907 | 6 | N. D. |
|                                                  | ACTGcTaTacACTCCtT<br>aTT | 1894393 | 6 | N. D. |
| <i>bceB</i> (B10)<br>ACTGCGCTCTACTCC<br>ATTTTTGG | ctTGCGCcCTACTCgtT<br>TTg | 2160530 | 6 | N. D. |

|                                                     |                          |         |   |       |
|-----------------------------------------------------|--------------------------|---------|---|-------|
|                                                     | ACgGaGCTtTgCTtCAc<br>TTT | 2272339 | 6 | N. D. |
|                                                     | AaTcCttTCTAaTCcTT<br>TT  | 3053355 | 6 | N. D. |
|                                                     | gCTGCGgaCaACgCaA<br>TTTT | 3149300 | 6 | N. D. |
|                                                     | ACTGCcCTgTACcgCA<br>TTga | 3220052 | 6 | N. D. |
|                                                     | ACTcCGCTCcAgTCgT<br>aTT  | 3587863 | 6 | N. D. |
|                                                     | caTGcTtTCTcCTCCAT<br>TTc | 3979194 | 6 | N. D. |
|                                                     | AaTcCGCTCTAaTCCcc<br>TTc | 4198187 | 6 | N. D. |
| <i>secE</i> (ET)<br><br>AACTGTTGAAATTA<br>CCGTAATGG | AAgTGTTGAAATTgC<br>gagAA | 317407  | 5 | N. D. |
|                                                     | cACTGTatAAAaTgCC<br>GTAA | 1696780 | 5 | N. D. |
|                                                     | AACaGcTaAAATTACC<br>GaAc | 1866534 | 5 | N. D. |
|                                                     | AttTtcTGAAATgACCG<br>TAA | 3988157 | 5 | N. D. |
|                                                     | AAaTGTacAccTTtCCG<br>TAA | 220164  | 6 | N. D. |
|                                                     | AACTGaTGAAAaTcaC<br>GaAg | 606068  | 6 | N. D. |
|                                                     | AgCgGTTGAAAaaACg<br>GTcA | 472034  | 6 | N. D. |
|                                                     | AACTGTTGtAcTTgCtt<br>TAg | 562905  | 6 | N. D. |
|                                                     | AtCaGTTGAAtcTACaa<br>TAA | 567300  | 6 | N. D. |
|                                                     | AACTGTTGtcATTcCC<br>aacA | 1024286 | 6 | N. D. |
|                                                     | AAaaGcTGAAATTgCC<br>agAA | 889421  | 6 | N. D. |
|                                                     | tgCTGgTGAAATatCCG<br>TcA | 1067619 | 6 | N. D. |
|                                                     | cACaGTTGAAATTcCC<br>aTct | 2012454 | 6 | N. D. |
|                                                     | AACTGTTGtAAgcAgC<br>GTcc | 2124900 | 6 | N. D. |
|                                                     | AACaGcTGAAATTgCg<br>GTgc | 2559395 | 6 | N. D. |



|                                                                                        |                          |         |   |       |
|----------------------------------------------------------------------------------------|--------------------------|---------|---|-------|
|                                                                                        | tcCTaTTtAcATTACtGT<br>AA | 2678358 | 6 | N. D. |
|                                                                                        | AAaTGaTGAAATTgCC<br>cTtg | 2570871 | 6 | N. D. |
|                                                                                        | AAgTGcaGtAATTtCCG<br>TgA | 3106624 | 6 | N. D. |
|                                                                                        | AgCaacTGAAATgAtCG<br>TAA | 3355687 | 6 | N. D. |
|                                                                                        | AtCTaTTGAAgcaACC<br>GTtA | 3390424 | 6 | N. D. |
|                                                                                        | AtCTGaaGAAATggCaG<br>TAA | 3545382 | 6 | N. D. |
|                                                                                        | AcCTcTTGAAATgACa<br>GTtc | 4057929 | 6 | N. D. |
| <p style="text-align: center;"><i>secG</i>(GT)</p> <p>CTGCCAGCACTACC<br/>GTAATGCGG</p> | CTcCCAGCACTAtgtTg<br>ATG | 3023041 | 5 | N. D. |
|                                                                                        | tTGCCAGtAtcACCGTA<br>Acc | 690206  | 6 | N. D. |
|                                                                                        | CTGCCAtttCTACgGTg<br>AcG | 901205  | 6 | N. D. |
|                                                                                        | CaGCCAGCACaAgCcT<br>gATc | 1820492 | 6 | N. D. |
|                                                                                        | tTGCCAGCACTtCaaTg<br>AgG | 1773765 | 6 | N. D. |
|                                                                                        | CaaCgAGCtCTACcTA<br>ATc  | 2468172 | 6 | N. D. |
|                                                                                        | CTGaCAGaACTACaGT<br>Atca | 2827558 | 6 | N. D. |
|                                                                                        | CaGCtAGCACTgCaGa<br>AAcG | 3475794 | 6 | N. D. |

Annotations:

<sup>a</sup>: Chromosomal areas most similar to target sequence were predicted by Cas-OFFinder

<sup>b</sup>: Genome positions of *Bacillus subtilis* 168 predicted by Cas-OFFinder

<sup>c</sup>: The number of mismatched bases between target region and off-target region

<sup>d</sup>: The designated off-target Positions were detected by Next-Generation Sequencing (NGS)

N.D.: Not detection

## Supplementary Figure

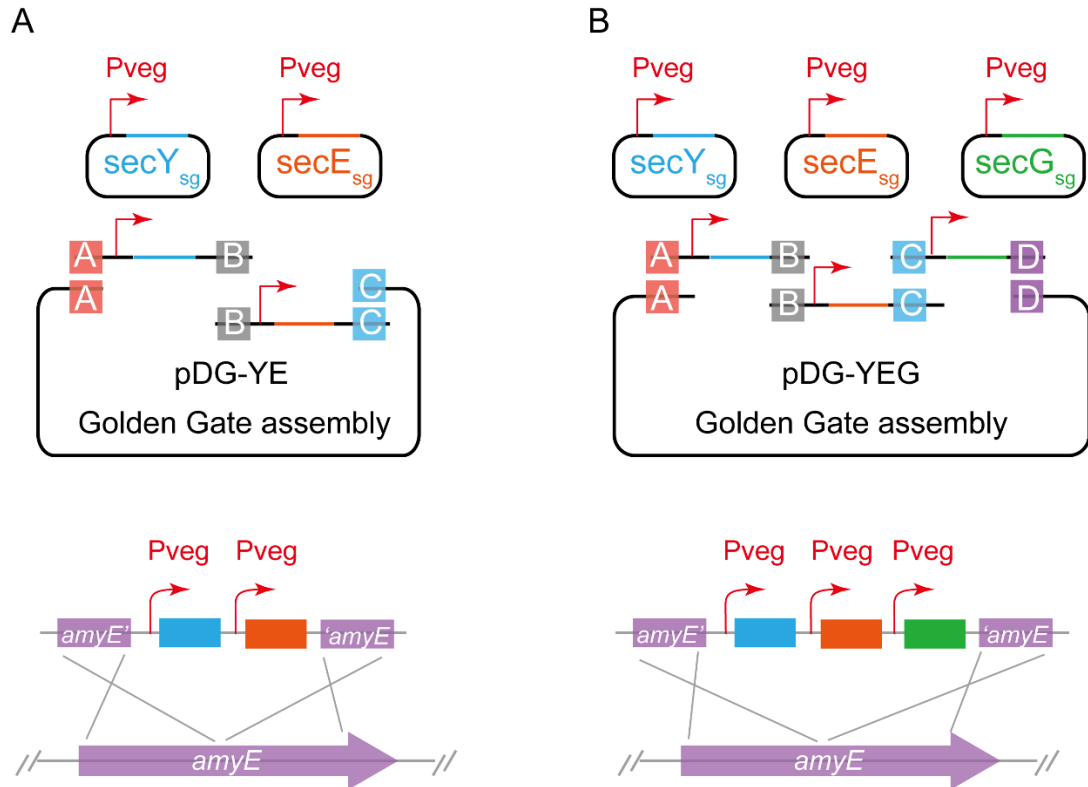

**Supplementary Figure S1. Design and construction of multiplex base editing system.** (A) For double genes editing, the sgRNA targeting *secY*, and *secE* were simultaneously ligated to the integration vector PDG via Golden Gate assembly. The resulted pDG-YE was linearized and integrated into the *amyE* site of *B. subtilis* genome. (B) For triplex genes editing, the sgRNA targeting *secY*, *secE*, and *secG* were simultaneously ligated to the integration vector PDG via Golden Gate assembly. The resulted pDG-YEG was linearized and integrated into the *amyE* site of *B. subtilis* genome.

A

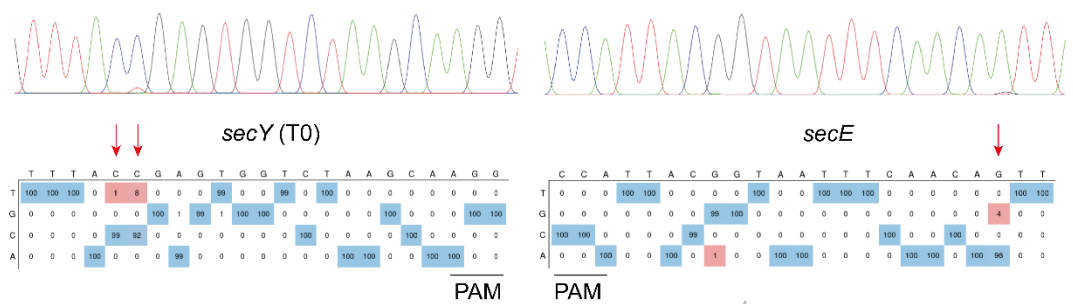

B

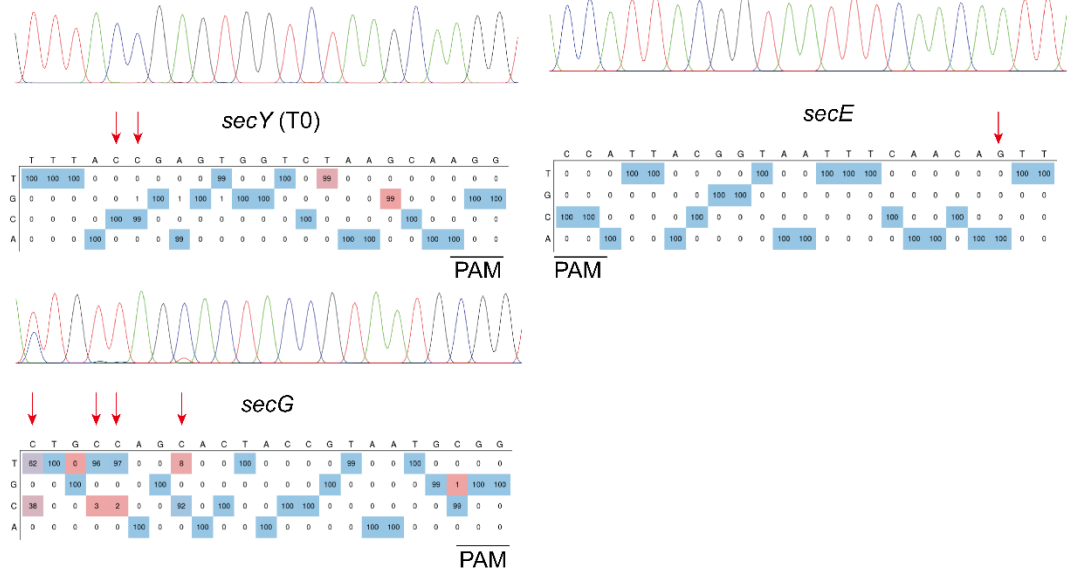

**Supplementary Figure S2. Mixed culture sequencing for multiplex base editing in *B. subtilis*.** (A) The sequencing results concurrently edited by *secY* and *secE*. (B) The sequencing results concurrently edited by *secY*, *secE* and *secG*.

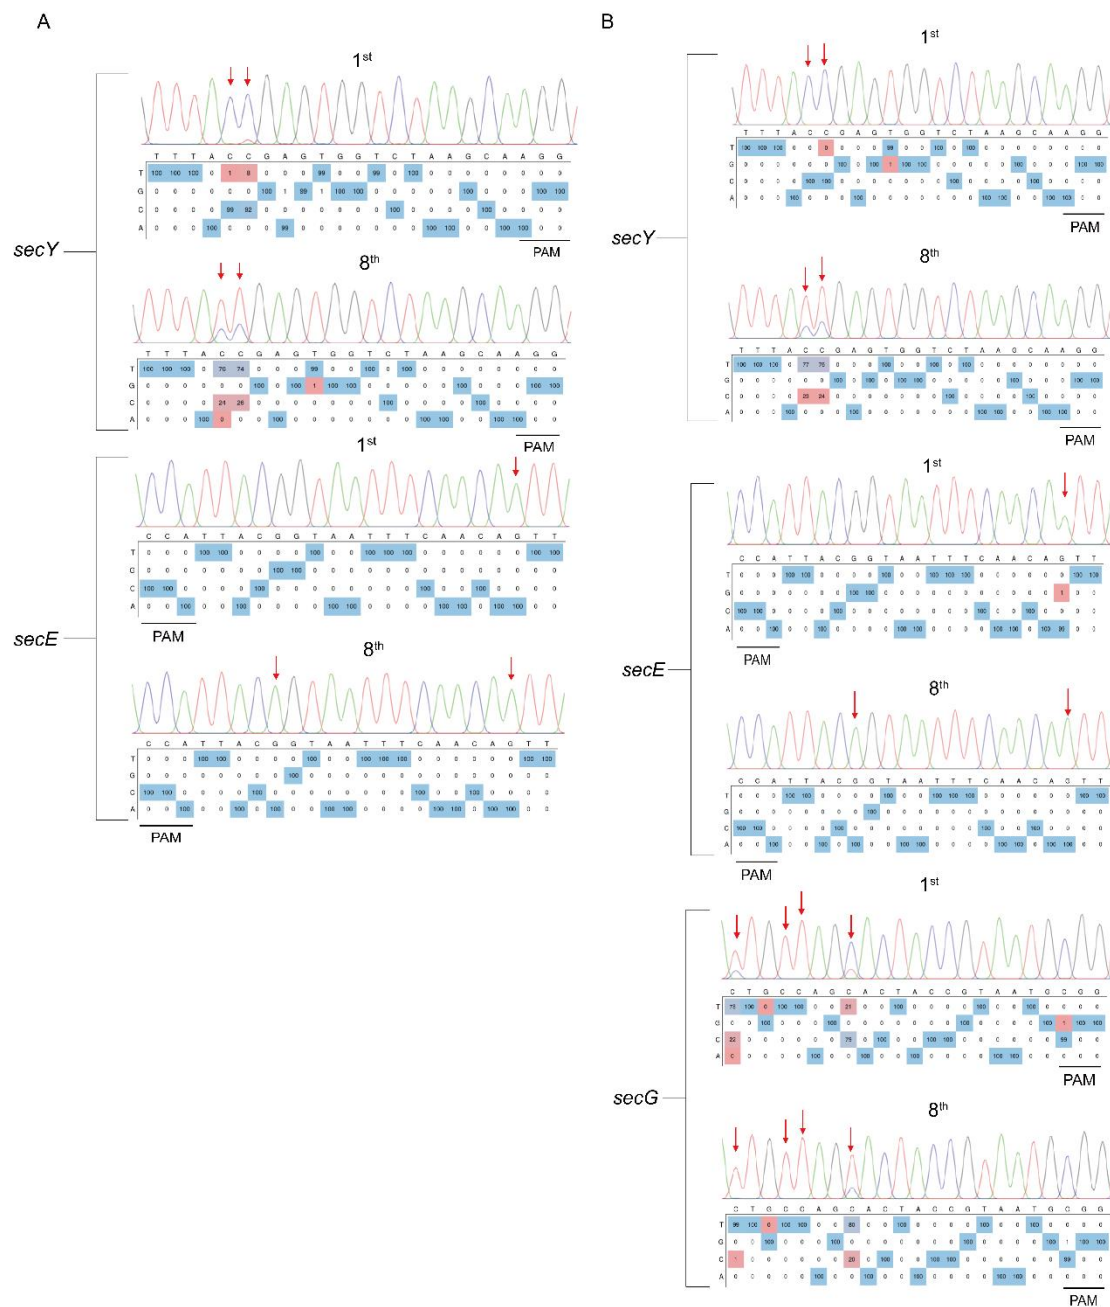

**Supplementary Figure S3. Improvement of editing efficiency by iterating in *B. subtilis*.** (A) The population sequencing results for editing *secY* and *secE* simultaneously. The first and eighth generation sequencing results were displayed from top to bottom. (B) The population sequencing results for editing *secY*, *secE* and *secG* simultaneously. The first and eighth generation sequencing results were displayed from top to bottom. The red arrow indicates the modified bases.

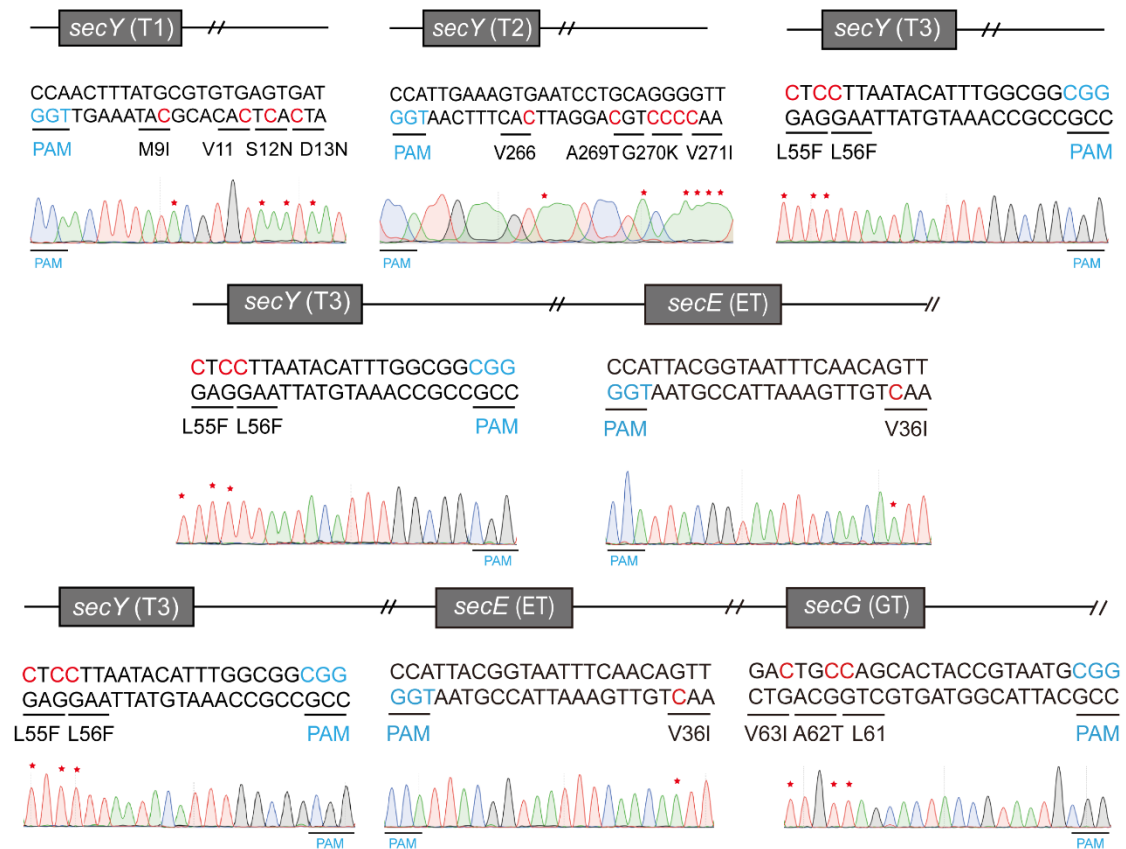

**Supplementary Figure S4. Sequencing results of the *Sec* translocase mutants isolated from the mutant library.** After about 10 hours for base editing, each base-edited cell culture was diluted to a suitable concentration and evenly spread on the LB plates. Two colonies were randomly selected from the above LB plates for sequencing. Different mutants of *secY* were shown at the top. The combined mutant of *secY* and *secE* was shown in the middle. The triple combined mutants of *secY*, *secE*, and *secG* were shown at the bottom. The red stars indicate the position of the expected mutation. The substituted amino acids were shown in each mutant.

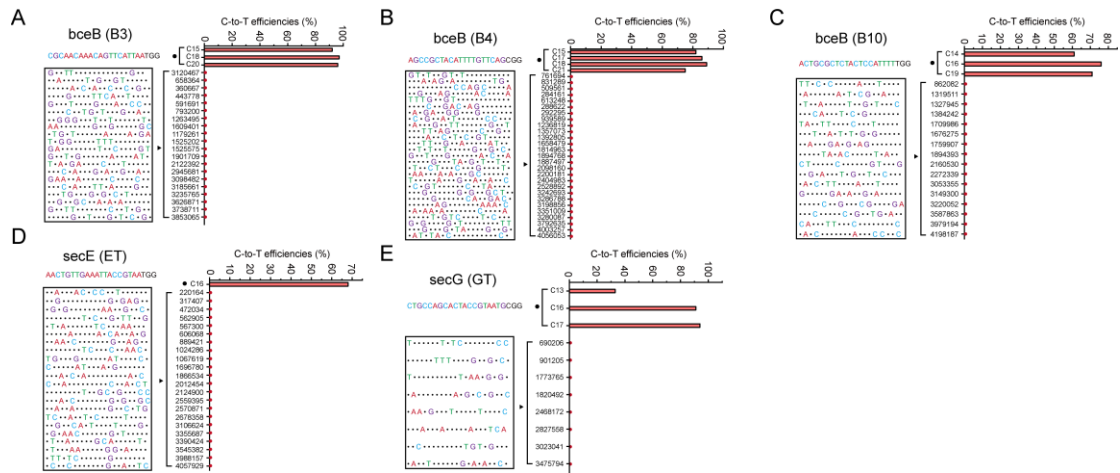

**Supplementary Figure S5. Off-target editing activities of CRISPR-CDA-nCas9-UGI in *B. subtilis*.** Off-target editing activities of CRISPR-CDA-nCas9-UGI was detected by NGS. (A-E) On- and off-target editing frequencies of five sgRNAs targeted to the B3 site (3110630-3110649, A), B4 site (3110357-3110376, B), B10 site (3109449-3109468, C), secE site (117620-117639, D), and secG site (3455137-3455156, E) with CRISPR-CDA-nCas9-UGI. On-target sites are marked with a black circle and off-target sites are marked with a black triangle. The red circles indicate that off-target editing activity is not detected. The sequences in the empty rectangle are possible off-target sites predicted by Cas-OFFinder (2).

**REFERENCES**

1. Lu, Z., Yang, S., Yuan, X., Shi, Y., Ouyang, L., Jiang, S., Yi, L. and Zhang, G. (2019) CRISPR-assisted multi-dimensional regulation for fine-tuning gene expression in *Bacillus subtilis*. *Nucleic Acids Res.*, **47**, e40.
2. Bae, S., Park, J. and Kim, J.S. (2014) Cas-OFFinder: a fast and versatile algorithm that searches for potential off-target sites of Cas9 RNA-guided endonucleases. *Bioinformatics*, **30**, 1473-1475.
